# Supplementary material for: Alternative package leaflets improve people’s understanding of drug side effects—A randomized controlled exploratory survey
Source: PLOS journal article supplement (doi:10.1371/journal.pone.0203800), 2018-09-13
Supplement: S4 (10.1371/journal.pone.0203800.s004) [file journal.pone.0203800.s004]

**S2 Fig. Format 2: Alternative package leaflet (intervention): Drug facts box with reading instruction (translation)**

|                                                                                                                                                                                                                                                                                                                                                                                                |                                         |                                                |                                                                                          |
|------------------------------------------------------------------------------------------------------------------------------------------------------------------------------------------------------------------------------------------------------------------------------------------------------------------------------------------------------------------------------------------------|-----------------------------------------|------------------------------------------------|------------------------------------------------------------------------------------------|
| <b>Side effects</b>                                                                                                                                                                                                                                                                                                                                                                            |                                         |                                                |                                                                                          |
| Like all medications, Suffia® can have side effects. Not all undesired symptoms are necessarily due to taking the drug. Undesired symptoms can also arise without taking the drug.                                                                                                                                                                                                             |                                         |                                                |                                                                                          |
| Occurrence of undesired symptoms over 5 years:                                                                                                                                                                                                                                                                                                                                                 |                                         |                                                |                                                                                          |
| <b>Undesired symptoms</b>                                                                                                                                                                                                                                                                                                                                                                      | <b>Of 100 persons who take Suffia®:</b> | <b>Of 100 Persons who do NOT take Suffia®:</b> | <b>Undesired symptoms that are ascribed to Suffia® intake:</b>                           |
| Increased blood sugar levels                                                                                                                                                                                                                                                                                                                                                                   | 16 of 100                               | 13 of 100                                      | Taking Suffia® results in increased blood sugar levels in an additional 3 of 100 people. |
| Slow heart rate                                                                                                                                                                                                                                                                                                                                                                                | 5 of 100                                | 2 of 100                                       | Taking Suffia® results in slow heart rate in an additional 3 of 100 people.              |
| Anemia                                                                                                                                                                                                                                                                                                                                                                                         | 4 of 100                                | 4 of 100                                       | Taking Suffia® has no impact on anemia.                                                  |
| Depression                                                                                                                                                                                                                                                                                                                                                                                     | 9 of 100                                | 12 of 100                                      | Taking Suffia® prevents depression in 3 of 100 people.                                   |
| How to read this table: Of 100 people taking Suffia® over 5 years, 16 have increased blood sugar levels. Of 100 comparable people <b>not</b> taking Suffia®, 13 have increased blood sugar levels. Hence, 13 of 100 people taking Suffia® would have increased blood sugar levels even without taking the drug. Suffia® therefore causes an increase in blood sugar levels in 3 of 100 people. |                                         |                                                |                                                                                          |
